# Supplementary material for: Mixed Matrix Membranes Loaded with a Porous Organic Polymer Having Bipyridine Moieties
Source: MDPI journal article supplement (doi:10.3390/membranes12060547), 2022-05-25
Supplement: s1 [file s1]

# Mixed Matrix Membranes Loaded with a Porous Organic Polymer Having Bipyridine Moieties

Sandra Rico-Martínez <sup>1</sup>, Cristina Álvarez <sup>2,3,\*</sup>, Antonio Hernández <sup>3</sup>, Jesús A. Miguel <sup>1,\*</sup> and Ángel E. Lozano <sup>1,2,3</sup>

<sup>1</sup> IU CINQUIMA, University of Valladolid, Paseo Belén 5, E-47011 Valladolid, Spain; sandra.rico@uva.es, jamiguel@uva.es

<sup>2</sup> Institute for Polymer Science and Technology (ICTP-CSIC), Juan de la Cierva 3, E-28006 Madrid, Spain; cristina.alvarez@ictp.csic.es; lozano@ictp.csic.es

<sup>3</sup> Surfaces and Porous Materials (SMAP, UA-UVA-CSIC), Associated Research Unit to CSIC. University of Valladolid, Paseo Belén 7, E-47011 Valladolid, Spain; antonio.hernandez@uva.es

\* Correspondence: Correspondence: cristina.alvarez@ictp.csic.es; jamiguel@uva.es

## Table of content

- S1. Synthesis of 4,5-diazafluoren-9-one (DAFO)
- S2. Synthesis of 135TPB-DAFO (POP)
- S3. Characterization of 135TPB-DAFO (POP)
- S4. Characterization of MMMs
- S5. Gas separation properties

### S1. Synthesis of 4,5-diazafluoren-9-one (DAFO)

4,5-diazafluoren-9-one (DAFO) was synthesized following the methodology described elsewhere [1], which is shown in Scheme S1. First, a mixture of H<sub>2</sub>SO<sub>4</sub> (125 mL) and HNO<sub>3</sub> (63 mL) was carefully added to a mixture of 1,10-phenantroline (phen) (12.4 g, 68.9 mmol) and KBr (12.8 g, 108 mmol) cooled on an ice bath. The reaction was heated to reflux for 3 h and then was neutralized with an aqueous solution of NaOH. After filtering, the product was recrystallized from EtOH. 1,10-phenantroline-5,6-dione (PHADO) was obtained in 70% yield. Next, PHADO (4.00 g, 19.0 mmol) and a 0.25 M NaOH solution (200 mL) were heated to 60 °C in an open flask until the volume was halved. Afterwards, the product was filtered, washed several times with distilled water and dried under vacuum. Finally, the DAFO was purified by filtration through aluminium oxide, using chloroform as solvent, and obtained in 81% yield. <sup>1</sup>H-NMR spectrum of DAFO (500 MHz, CDCl<sub>3</sub>) is shown in Figure S1; δ(ppm): 8.81 (dd, J = 5.0, 1.6 Hz, 2H), 8.00 (dd, J = 7.5, 1.6 Hz, 2H), 7.36 (dd, J = 7.5, 5.0 Hz, 2H).

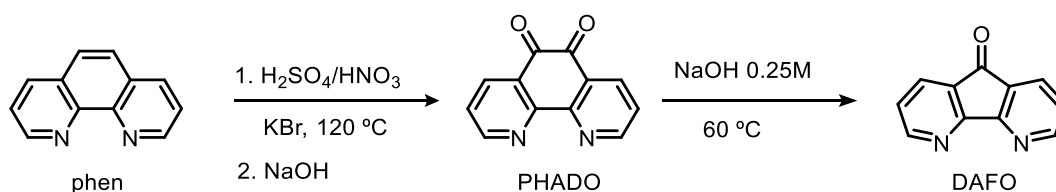

**Scheme S1.** Synthesis of 4,5-diazafluoren-9-one (DAFO).

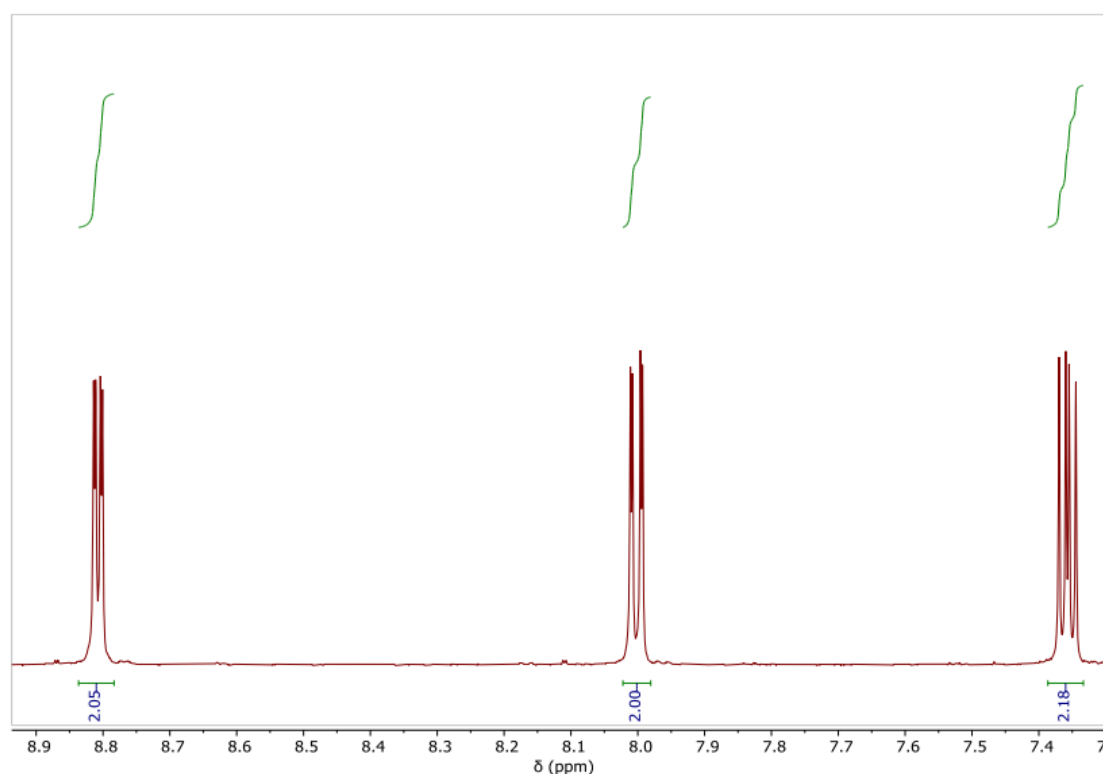

**Figure S1.** <sup>1</sup>H-NMR of 4,5-diazafluoren-9-one (DAFO) in CDCl<sub>3</sub>.

## S2. Synthesis of 135TPB-DAFO (POP)

The porous organic polymer (POP) was obtained by reacting stoichiometric amounts of 1,3,5-triphenylbenzene and DAFO in TFSA following the method described as follows [1], as shown in Scheme S2.

An oven-dried three-necked Schlenk flask, equipped with a mechanical stirrer and N<sub>2</sub> inlet and outlet, was charged with 11 mmol of 1,3,5-triphenylbenzene (2 equivalents), and 16.5 mmol of DAFO (3 equivalents). Next, anhydrous chloroform (15 mL) was added, and the resulting mixture was stirred for 30 min at room temperature under a nitrogen blanket. Afterward, the mixture was cooled to 0 °C, and TFSA (30 mL) was dropwise added. The mixture was left to warm up to room temperature and then it was stirred for 4 days. Finally, the product was poured into water, filtered, and consecutively washed with basic water, water, methanol, acetone, and chloroform. After drying at 180 °C for 24 h under vacuum, the material was obtained as a brown powder in 99% yield.

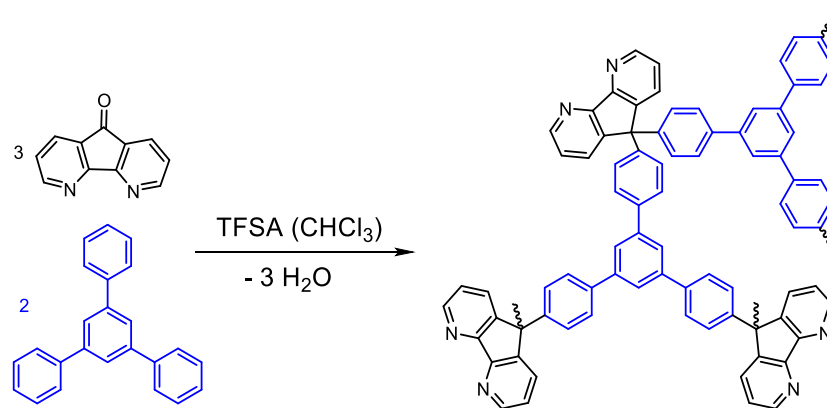

**Scheme S2.** Synthesis of 135TPB-DAFO.

### S3. Characterization of 135TPB-DAFO (POP)

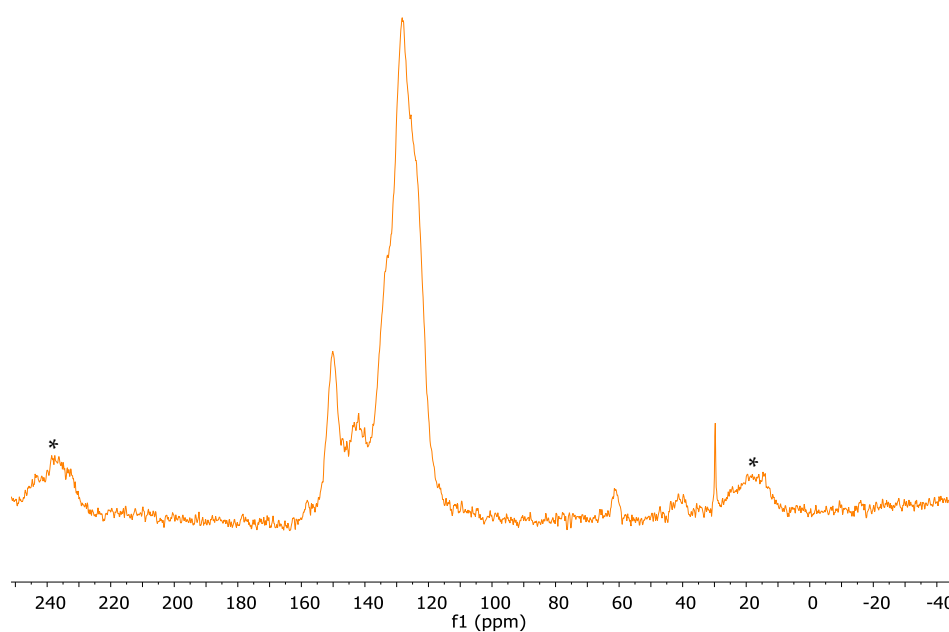

**Figure S2.** CP/MAS  $^{13}\text{C}$  NMR spectrum of 135TPB-DAFO (POP). \* denote spinning side bands [1].

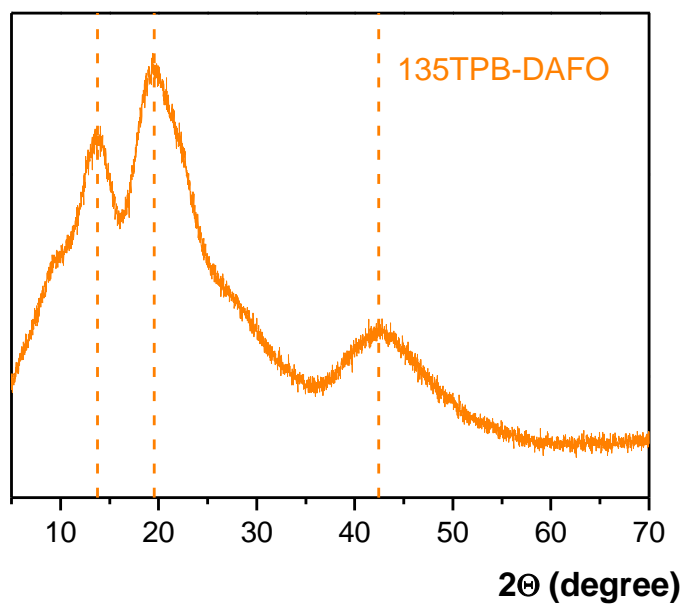

**Figure S3.** WAXD pattern of 135TPB-DAFO.

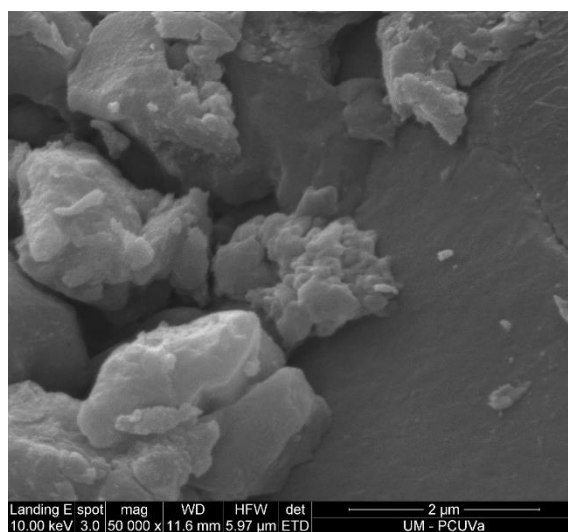

Figure S4. SEM micrograph of 135TPB-DAFO.

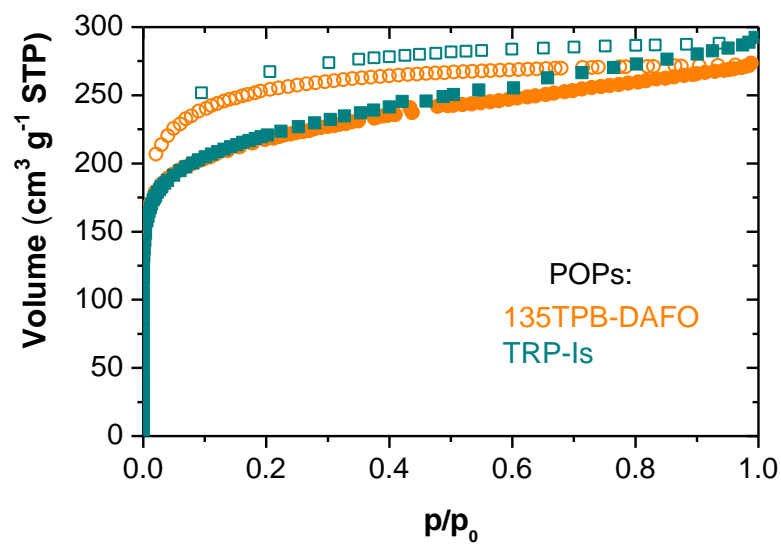

Figure S5. Low-pressure N<sub>2</sub> adsorption (full symbols)/desorption (empty symbols) isotherms measured at 77 K for POPs: 135TPB-DAFO (orange) and TRP-Is (green).

## S4. Characterization of MMMs

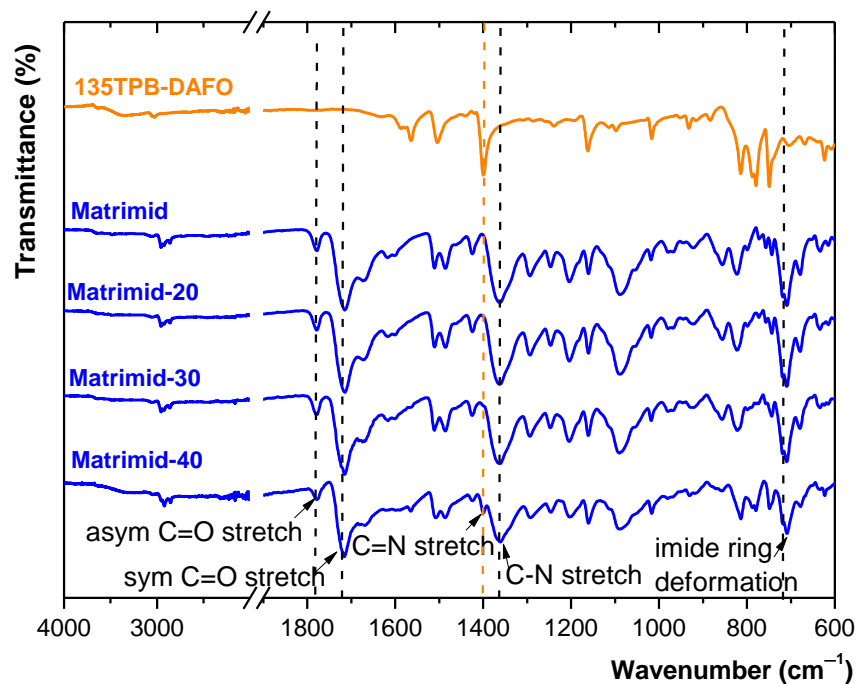

Figure S6. ATR-FTIR spectra of POP, neat Matrimid membrane and Matrimid-based MMMs.

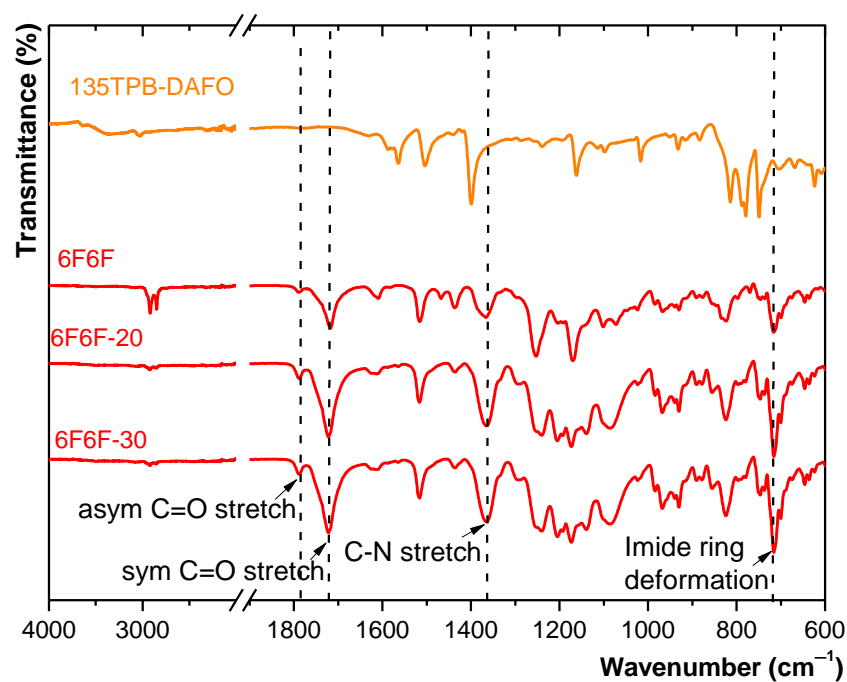

Figure S7. ATR-FTIR spectra of POP, neat 6F6F membrane and 6F6F-based MMMs.

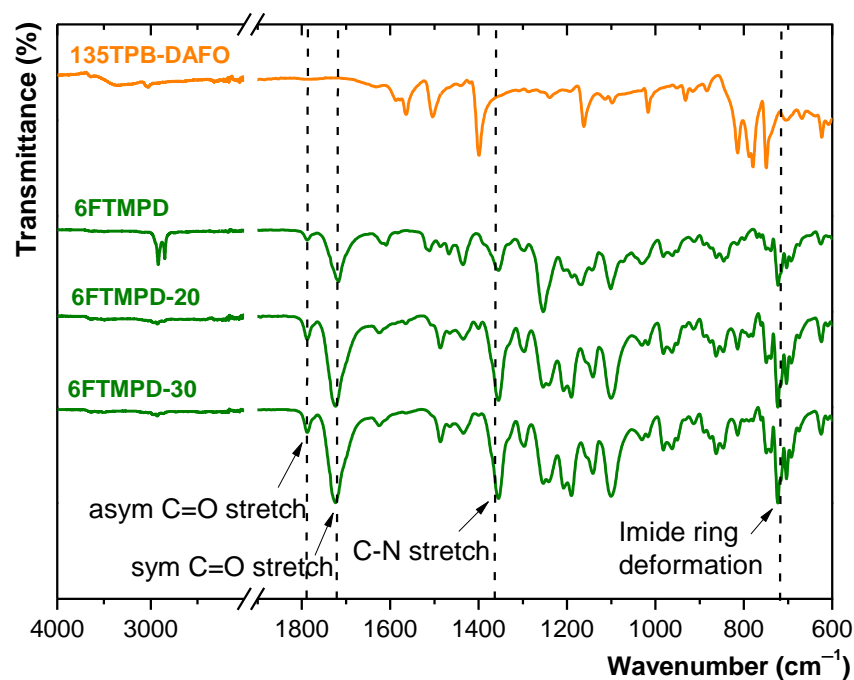

**Figure S8.** ATR-FTIR spectra of POP, neat 6FTMPD membrane and 6FTMPD-based MMMs.

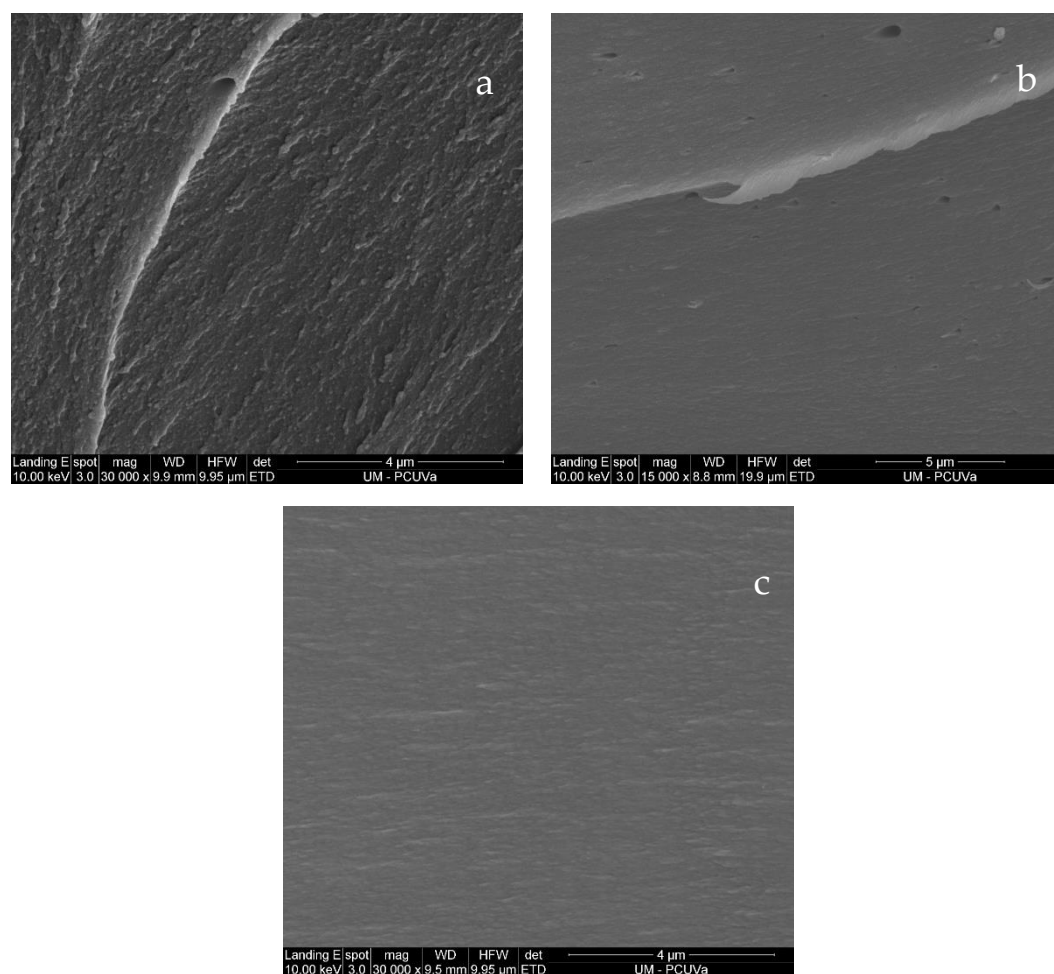

**Figure S9.** SEM micrographs of neat polyimide membranes: (a) Matrimid, (b) 6F6F, and (c) 6FTMPD.

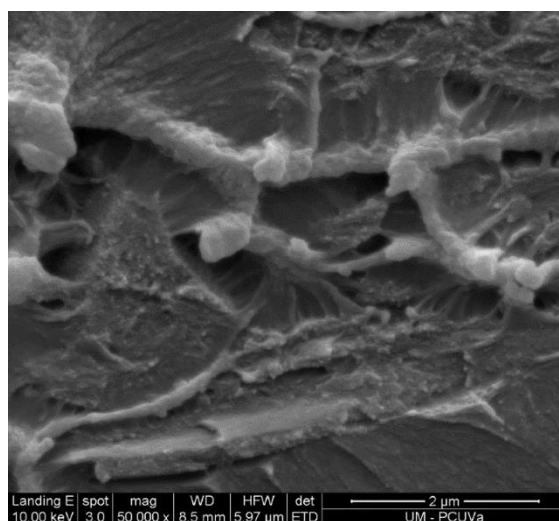

Figure S10. SEM micrograph of Matrimid-40.

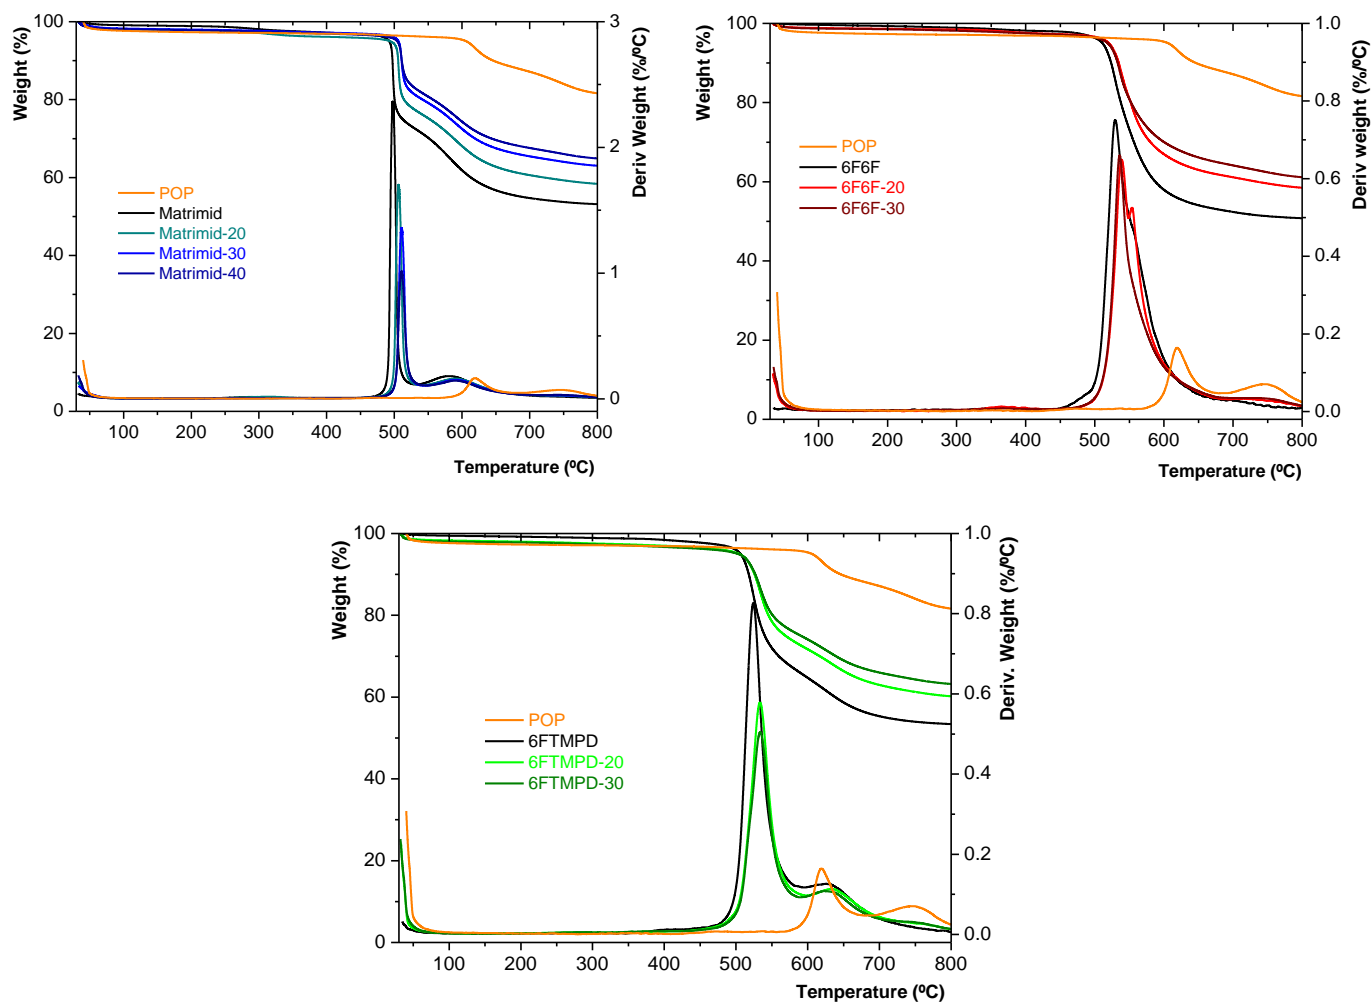

Figure S11. TGA curves of Matrimid (top left), 6F6F (top right) and 6FTMPD (bottom) of MMMs.

### S5. Gas separation properties of MMMs

**Table S1.** Permeability (P, Barrer), diffusivity (D,  $\text{cm}^2 \text{s}^{-1} \times 10^8$ ) and solubility (S,  $\text{cm}^3(\text{STP}) \text{cm}^{-3} \text{atm}^{-1}$ ) coefficients for 135TPB-DAFO POP-based MMMs and neat polyimide membranes at 30 °C and 3 bar feed pressure.

| Membrane    | Thickness<br>( $\mu\text{m}$ ) |   | He  | N <sub>2</sub> | O <sub>2</sub> | CH <sub>4</sub> | CO <sub>2</sub> | $\alpha_{\text{O}_2/\text{N}_2}$ | $\alpha_{\text{CO}_2/\text{CH}_4}$ | $\alpha_{\text{CO}_2/\text{N}_2}$ |
|-------------|--------------------------------|---|-----|----------------|----------------|-----------------|-----------------|----------------------------------|------------------------------------|-----------------------------------|
| Matrimid    | 54                             | P | 22  | 0.25           | 1.60           | 0.22            | 8.60            | 6.4                              | 39.0                               | 25.02                             |
|             |                                | D | -   | 0.32           | 1.60           | 0.066           | 0.64            | 5.0                              | 9.7                                | 1.60                              |
|             |                                | S | -   | 0.59           | 0.76           | 2.53            | 10.2            | 1.2                              | 4.1                                | 17.3                              |
| Matrimid-20 | 53                             | P | 34  | 0.85           | 4.41           | 0.70            | 20.9            | 5.19                             | 29.8                               | 24.5                              |
|             |                                | D | -   | 0.59           | 2.82           | 0.15            | 1.10            | 4.78                             | 7.33                               | 1.86                              |
|             |                                | S | -   | 1.09           | 1.19           | 3.44            | 14.4            | 1.09                             | 4.19                               | 13.2                              |
| Matrimid-30 | 67                             | P | 49  | 1.58           | 8.55           | 1.58            | 37.9            | 5.41                             | 24.0                               | 24.0                              |
|             |                                | D | -   | 1.16           | 4.45           | 0.29            | 1.89            | 3.77                             | 6.52                               | 1.63                              |
|             |                                | S | -   | 1.03           | 1.46           | 4.13            | 15.2            | 1.44                             | 3.68                               | 14.7                              |
| Matrimid-40 | 58                             | P | 74  | 3.29           | 16.3           | 2.83            | 87.2            | 4.95                             | 30.8                               | 26.5                              |
|             |                                | D | -   | 2.10           | 7.28           | 0.46            | 3.21            | 3.47                             | 6.98                               | 1.53                              |
|             |                                | S | -   | 1.19           | 1.71           | 4.65            | 20.7            | 1.44                             | 4.45                               | 17.4                              |
| 6F6F        | 61                             | P | 156 | 3.6            | 18             | 1.7             | 71              | 4.57                             | 37.7                               | 19.0                              |
|             |                                | D | -   | 2.6            | 9.2            | 0.381           | 3.9             | 4.10                             | 7.15                               | 1.85                              |
|             |                                | S | -   | 1.05           | 1.49           | 3.39            | 13.8            | 1.10                             | 5.32                               | 10.2                              |
| 6F6F-20     | 51                             | P | 175 | 10.0           | 36.1           | 6.57            | 161             | 3.61                             | 24.5                               | 16.1                              |
|             |                                | D | -   | 5.30           | 15.4           | 1.16            | 5.51            | 2.90                             | 4.75                               | 1.04                              |
|             |                                | S | -   | 1.44           | 1.78           | 4.32            | 22.2            | 1.24                             | 5.14                               | 15.4                              |
| 6F6F-30     | 69                             | P | 205 | 13.6           | 54.3           | 10.0            | 261             | 3.99                             | 26.1                               | 19.2                              |
|             |                                | D | -   | 8.34           | 21.6           | 2.33            | 13.6            | 2.59                             | 5.84                               | 1.63                              |
|             |                                | S | -   | 1.24           | 1.91           | 3.27            | 14.5            | 1.54                             | 4.43                               | 11.7                              |
| 6FTMPD      | 48                             | P | 328 | 25             | 94             | 19              | 444             | 3.82                             | 22.0                               | 17.7                              |
|             |                                | D | -   | 9.3            | 29             | 2.3             | 14              | 3.1                              | 6.1                                | 1.5                               |
|             |                                | S | -   | 2.04           | 2.46           | 6.28            | 24.1            | 1.2                              | 3.8                                | 12                                |
| 6FTMPD-20   | 57                             | P | 400 | 48.5           | 165            | 44.2            | 832             | 3.40                             | 18.8                               | 17.1                              |
|             |                                | D | -   | 18.3           | 58.1           | 5.0             | 22.5            | 3.17                             | 4.5                                | 1.23                              |
|             |                                | S | -   | 2.01           | 2.16           | 6.72            | 28.1            | 1.08                             | 4.18                               | 14.05                             |
| 6FTMPD-30   | 70                             | P | 557 | 81.1           | 280            | 84.6            | 1450            | 3.45                             | 17.1                               | 17.9                              |
|             |                                | D | -   | 25.4           | 74.2           | 7.4             | 39.4            | 2.92                             | 5.32                               | 1.55                              |
|             |                                | S | -   | 2.43           | 2.87           | 8.93            | 28.0            | 1.18                             | 3.13                               | 11.5                              |



**Table S2.** Permeability (P, Barrer) and ideal selectivity for 135TPB-DAFO POP-based MMMs and neat polyimide membranes at 30 °C and 3 bar feed pressure.

| Membrane                   | C <sub>2</sub> H <sub>6</sub> | C <sub>2</sub> H <sub>4</sub> | C <sub>3</sub> H <sub>8</sub> | C <sub>3</sub> H <sub>6</sub> | $\alpha_{C_2H_4/C_2H_6}$ | $\alpha_{C_3H_6/C_3H_8}$ | Reference  |
|----------------------------|-------------------------------|-------------------------------|-------------------------------|-------------------------------|--------------------------|--------------------------|------------|
| <b>6F6F</b> <sup>a</sup>   | 0.48                          | 2.1                           | 0.056                         | 0.89                          | 4.4                      | 16                       | [2]        |
| <b>6F6F</b> <sup>b</sup>   |                               |                               | 0.050                         | 0.85                          |                          | 17                       | [3]        |
| <b>6F6F</b>                | 0.345                         | 1.52                          |                               |                               | 4.4                      |                          | This study |
| <b>6F6F-20</b>             | 2.59                          | 9.55                          | 0.219                         | 4.0                           | 3.7                      | 18.3                     | This study |
| <b>6FTMPD</b> <sup>a</sup> | 20 <sup>c</sup>               | 58 <sup>c</sup>               | 2.73                          | 30                            | 2.9                      | 11                       | [4]        |
| <b>6FTMPD</b>              | 16.0                          | 48.6                          | 1.69                          | 26.2                          | 3.04                     | 15.5                     | This study |
| <b>6FTMPD-20</b>           | 26.9                          | 77.3                          | 5.53                          | 58.1                          | 2.87                     | 10.5                     | This study |

<sup>a</sup> 35 °C and 3.8 bar feed pressure, <sup>b</sup> 35 °C and 2 bar feed pressure, <sup>c</sup> 50 °C and 2 bar feed pressure

## References.

1. Esteban, N.; Ferrer, M. L.; Ania, C. O.; de la Campa, J. G.; Lozano, Á. E.; Álvarez, C.; Miguel, J. A. Porous Organic Polymers Containing Active Metal Centers for Suzuki–Miyaura Heterocoupling Reactions. *ACS Appl. Mater. Interfaces* **2020**, *12*, 56974–56986, doi:10.1021/acsami.0c16184.
2. Staudt-Bickel, C.; Koros, W. J. Olefin/paraffin gas separations with 6FDA-based polyimide membranes. *J. Memb. Sci.* **2000**, *170*, 205–214, doi:10.1016/S0376-7388(99)00351-8.
3. Das, M.; Koros, W. J. Performance of 6FDA–6FpDA polyimide for propylene/propane separations. *J. Memb. Sci.* **2010**, *365*, 399–408, doi:10.1016/j.memsci.2010.09.029.
4. Zhang, C.; Dai, Y.; Johnson, J. R.; Karvan, O.; Koros, W. J. High performance ZIF-8 / 6FDA-DAM mixed matrix membrane for propylene / propane separations. *J. Memb. Sci.* **2012**, *389*, 34–42, doi:10.1016/j.memsci.2011.10.003.
